# Supplementary material for: TP53 somatic mutations in Asian breast cancer are associated with subtype-specific effects
Source: bioRxiv or medRxiv preprint supplement (doi:10.1101/2022.03.31.486643), 2022-04-02

Supplementary Figure 1. Distribution of somatic TP53 mutations identified in MyBrCa Cohort

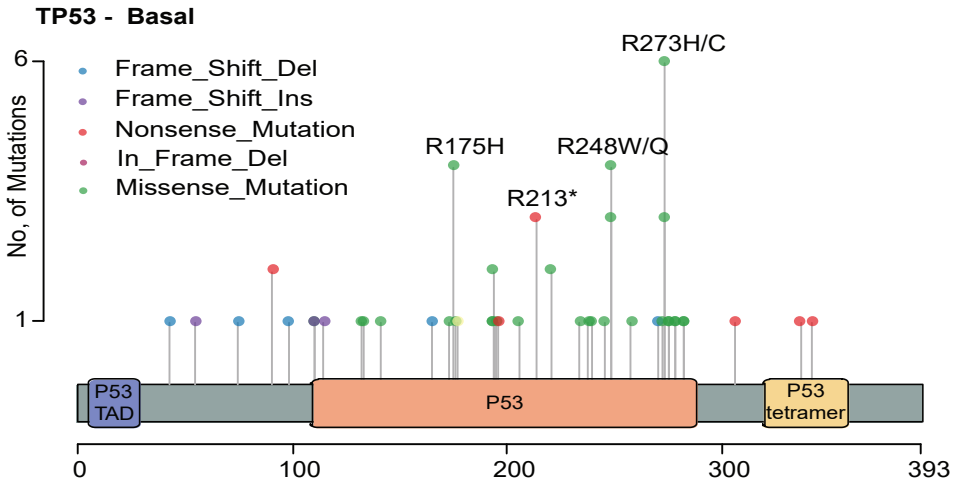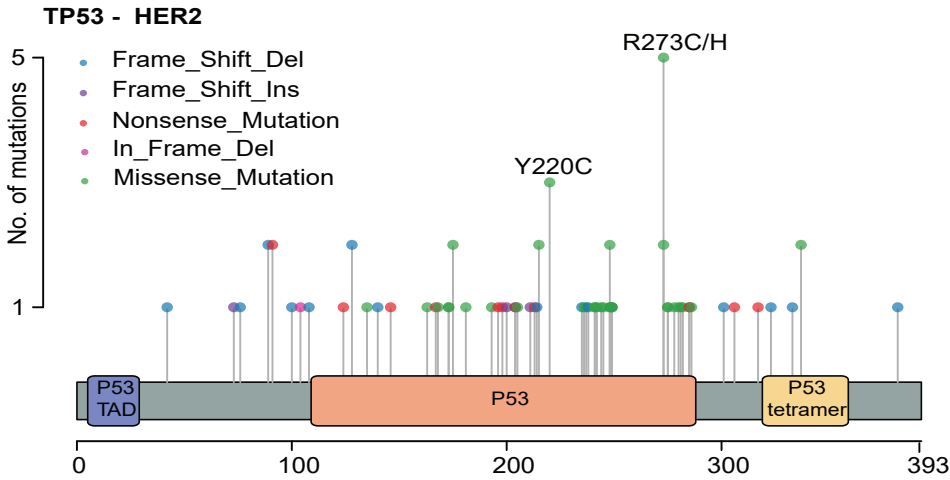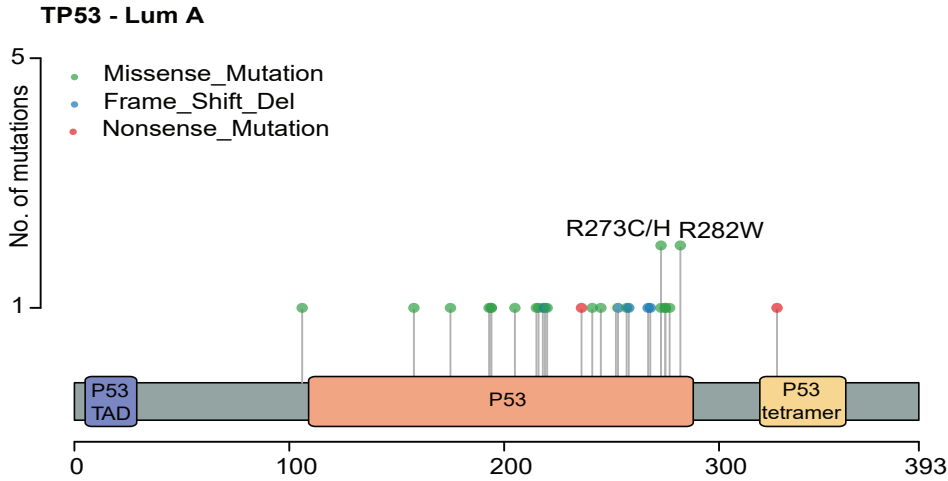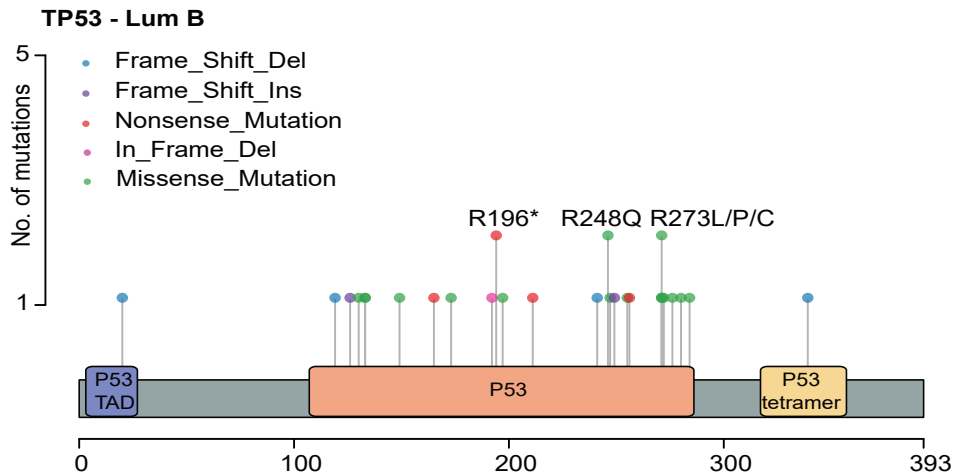

Supplement: Supplementary file [file media-1.pdf]
