# Supplementary material for: TP53 somatic mutations in Asian breast cancer are associated with subtype-specific effects
Source: bioRxiv or medRxiv preprint supplement (doi:10.1101/2022.03.31.486643), 2022-04-02

## Supplementary Figure 2. *TP53* Cancer Cell Fraction

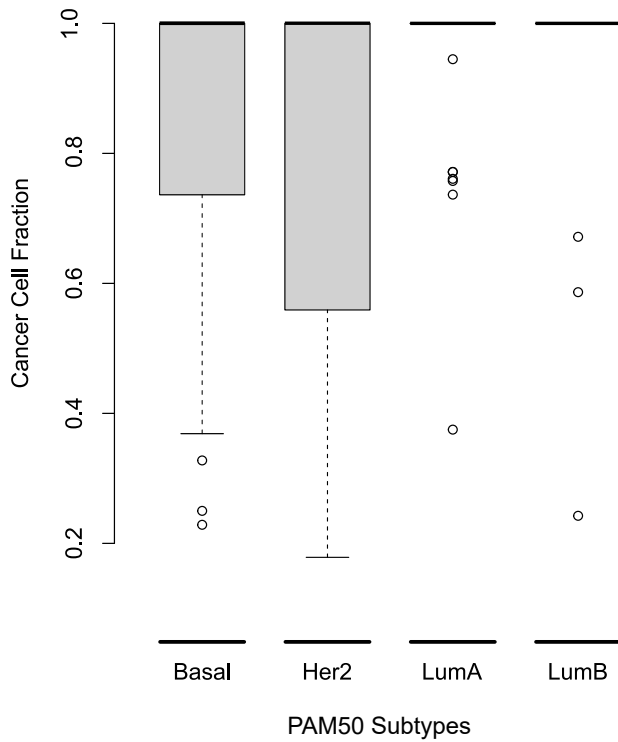

Supplement: Supplementary file [file media-3.pdf]
