# Supplementary material for: TP53 somatic mutations in Asian breast cancer are associated with subtype-specific effects
Source: bioRxiv or medRxiv preprint supplement (doi:10.1101/2022.03.31.486643), 2022-04-02
Supplement: Supplementary file [file media-4.pdf]

**Supplementary Table 2** GSEA Hallmark Pathway

| Subtype   | Regulation     | Hallmark Pathway                           | NES    | FDR   | p-val |
|-----------|----------------|--------------------------------------------|--------|-------|-------|
| Basal     | Up-regulated   | HALLMARK_UNFOLDED_PROTEIN_RESPONSE         | 1.863  | 0.051 | 0.004 |
| Basal     | Up-regulated   | HALLMARK_MYC_TARGETS_V2                    | 1.768  | 0.041 | 0.006 |
| Basal     | Up-regulated   | HALLMARK_MYC_TARGETS_V1                    | 1.847  | 0.020 | 0.006 |
| Basal     | Up-regulated   | HALLMARK_E2F_TARGETS                       | 1.860  | 0.026 | 0.010 |
| Basal     | Up-regulated   | HALLMARK_UV_RESPONSE_UP                    | 1.570  | 0.104 | 0.016 |
| Basal     | Up-regulated   | HALLMARK_GLYCOLYSIS                        | 1.682  | 0.052 | 0.016 |
| Basal     | Up-regulated   | HALLMARK_MTORC1_SIGNALING                  | 1.713  | 0.044 | 0.025 |
| Basal     | Up-regulated   | HALLMARK_HYPOXIA                           | 1.546  | 0.106 | 0.027 |
| Basal     | Up-regulated   | HALLMARK_G2M_CHECKPOINT                    | 1.724  | 0.048 | 0.030 |
| Basal     | Down-regulated | HALLMARK_PANCREAS_BETA_CELLS               | -1.458 | 1.000 | 0.046 |
| Her2      | Up-regulated   | HALLMARK_MTORC1_SIGNALING                  | 1.680  | 0.507 | 0.011 |
| Her2      | Up-regulated   | HALLMARK_GLYCOLYSIS                        | 1.657  | 0.312 | 0.013 |
| Luminal A | Up-regulated   | HALLMARK_CHOLESTEROL_HOMEOSTASIS           | 1.713  | 0.082 | 0.003 |
| Luminal A | Up-regulated   | HALLMARK_IL2_STAT5_SIGNALING               | 1.693  | 0.080 | 0.003 |
| Luminal A | Up-regulated   | HALLMARK_INFLAMMATORY_RESPONSE             | 1.817  | 0.142 | 0.005 |
| Luminal A | Up-regulated   | HALLMARK_COMPLEMENT                        | 1.805  | 0.079 | 0.005 |
| Luminal A | Up-regulated   | HALLMARK_INTERFERON_GAMMA_RESPONSE         | 1.803  | 0.053 | 0.014 |
| Luminal A | Up-regulated   | HALLMARK_KRAS_SIGNALING_UP                 | 1.677  | 0.068 | 0.014 |
| Luminal A | Up-regulated   | HALLMARK_PI3K_AKT_MTOR_SIGNALING           | 1.582  | 0.089 | 0.018 |
| Luminal A | Up-regulated   | HALLMARK_IL6_JAK_STAT3_SIGNALING           | 1.674  | 0.062 | 0.024 |
| Luminal A | Up-regulated   | HALLMARK_MTORC1_SIGNALING                  | 1.639  | 0.077 | 0.028 |
| Luminal A | Up-regulated   | HALLMARK_TNFA_SIGNALING_VIA_NFKB           | 1.595  | 0.088 | 0.030 |
| Luminal A | Up-regulated   | HALLMARK_HYPOXIA                           | 1.419  | 0.154 | 0.033 |
| Luminal A | Up-regulated   | HALLMARK_ALLOGRAFT_REJECTION               | 1.733  | 0.087 | 0.033 |
| Luminal A | Up-regulated   | HALLMARK_UV_RESPONSE_UP                    | 1.462  | 0.138 | 0.037 |
| Luminal A | Up-regulated   | HALLMARK_EPITHELIAL_MESENCHYMAL_TRANSITION | 1.692  | 0.068 | 0.038 |
| Luminal A | Up-regulated   | HALLMARK_APICAL_JUNCTION                   | 1.489  | 0.126 | 0.050 |
| Luminal B | Up-regulated   | HALLMARK_OXIDATIVE_PHOSPHORYLATION         | 2.012  | 0.007 | 0.000 |
| Luminal B | Up-regulated   | HALLMARK_MYC_TARGETS_V1                    | 1.949  | 0.006 | 0.000 |
| Luminal B | Up-regulated   | HALLMARK_MYC_TARGETS_V2                    | 1.913  | 0.008 | 0.000 |
| Luminal B | Up-regulated   | HALLMARK_FATTY_ACID_METABOLISM             | 1.794  | 0.024 | 0.000 |
| Luminal B | Up-regulated   | HALLMARK_MTORC1_SIGNALING                  | 1.896  | 0.007 | 0.004 |
| Luminal B | Up-regulated   | HALLMARK_UNFOLDED_PROTEIN_RESPONSE         | 1.742  | 0.036 | 0.011 |
| Luminal B | Up-regulated   | HALLMARK_GLYCOLYSIS                        | 1.543  | 0.097 | 0.022 |
| Luminal B | Up-regulated   | HALLMARK_ADIPOGENESIS                      | 1.622  | 0.062 | 0.025 |
| Luminal B | Up-regulated   | HALLMARK_DNA_REPAIR                        | 1.657  | 0.060 | 0.032 |
| Luminal B | Up-regulated   | HALLMARK_UV_RESPONSE_UP                    | 1.457  | 0.133 | 0.042 |
| Luminal B | Up-regulated   | HALLMARK_PEROXISOME                        | 1.417  | 0.149 | 0.049 |
| Luminal B | Down-regulated | HALLMARK_NOTCH_SIGNALING                   | -1.843 | 0.043 | 0.004 |
| Luminal B | Down-regulated | HALLMARK_WNT_BETA_CATENIN_SIGNALING        | -1.587 | 0.302 | 0.039 |
